# Supplementary material for: Dual-functional gold–iron oxide core–satellite hybrid nanoparticles for sensitivity enhancement in biosensors via nanoplasmonic and preconcentration effects
Source: Royal Society of Chemistry journal article supplement (doi:10.1039/d1an01334c), 2021-01-01
Supplement: d1an01334c1.pdf [file d1an01334c1.pdf]

## SUPPLEMENTARY INFORMATION

### **Dual-Functional Gold-Iron Oxide Core-Satellite Hybrid Nanoparticles for Sensitivity Enhancement in Biosensors via Nanoplasmonic and Preconcentration Effects**

Yi-Chen Chen,<sup>†a</sup> Yu-Chen Chou,<sup>†a</sup> Jui-Han Chang,<sup>†a</sup> Li-Ting Chen,<sup>a</sup> Chun-Jen Huang,<sup>c</sup>  
Lai-Kwan Chau,<sup>\*a,b</sup> Yen-Ling Chen,<sup>\*a,b</sup>

<sup>a</sup>*Department of Chemistry and Biochemistry, National Chung Cheng University, Chiayi 621, Taiwan*

<sup>b</sup>*Center for Nano Bio-Detection, National Chung Cheng University, Chiayi 621, Taiwan*

<sup>c</sup>*Department of Chemical and Materials Engineering, NCU-Covestro Research Center, National Central University, Jhong-Li, Taoyuan 320, Taiwan.*

<sup>d</sup>*R&D Center for Membrane Technology, Chung Yuan Christian University, 200 Chung Pei Rd., Chung-Li City 32023, Taiwan.*

\*E-mails: chelkc@ccu.edu.tw (L.-K. Chau), yelichen@ccu.edu.tw (Y.-L. Chen)

<sup>†</sup>These authors contributed equally to this work

### **TABLE OF CONTENTS**

Figure S1. UV–Vis absorption spectrum.

Figure S2. TEM image.

Figure S3. DLS data.

Figure S4. Background nonspecific adsorption test.

Figure S5. Specificity test.

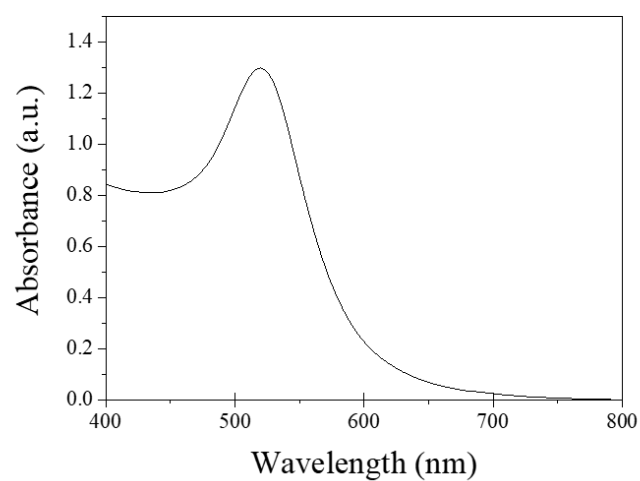

**Fig. S1** UV–Vis absorption spectrum of a solution of AuNPs in aqueous medium.

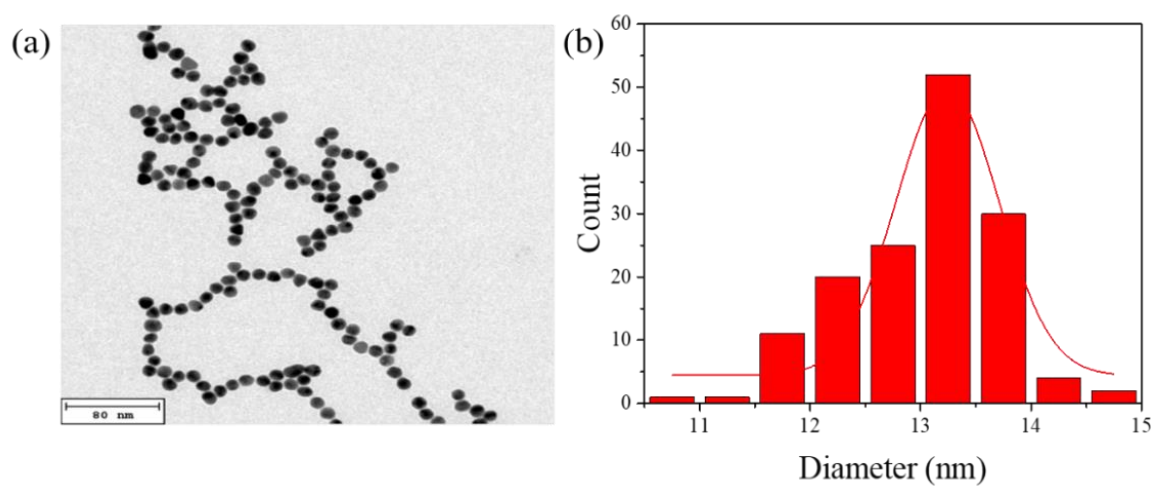

**Fig. S2** (a) TEM image of AuNPs. (b) Size distribution of AuNPs by TEM image analysis. Average diameter =  $13.0 \pm 0.7$  nm ( $n = 146$ ).

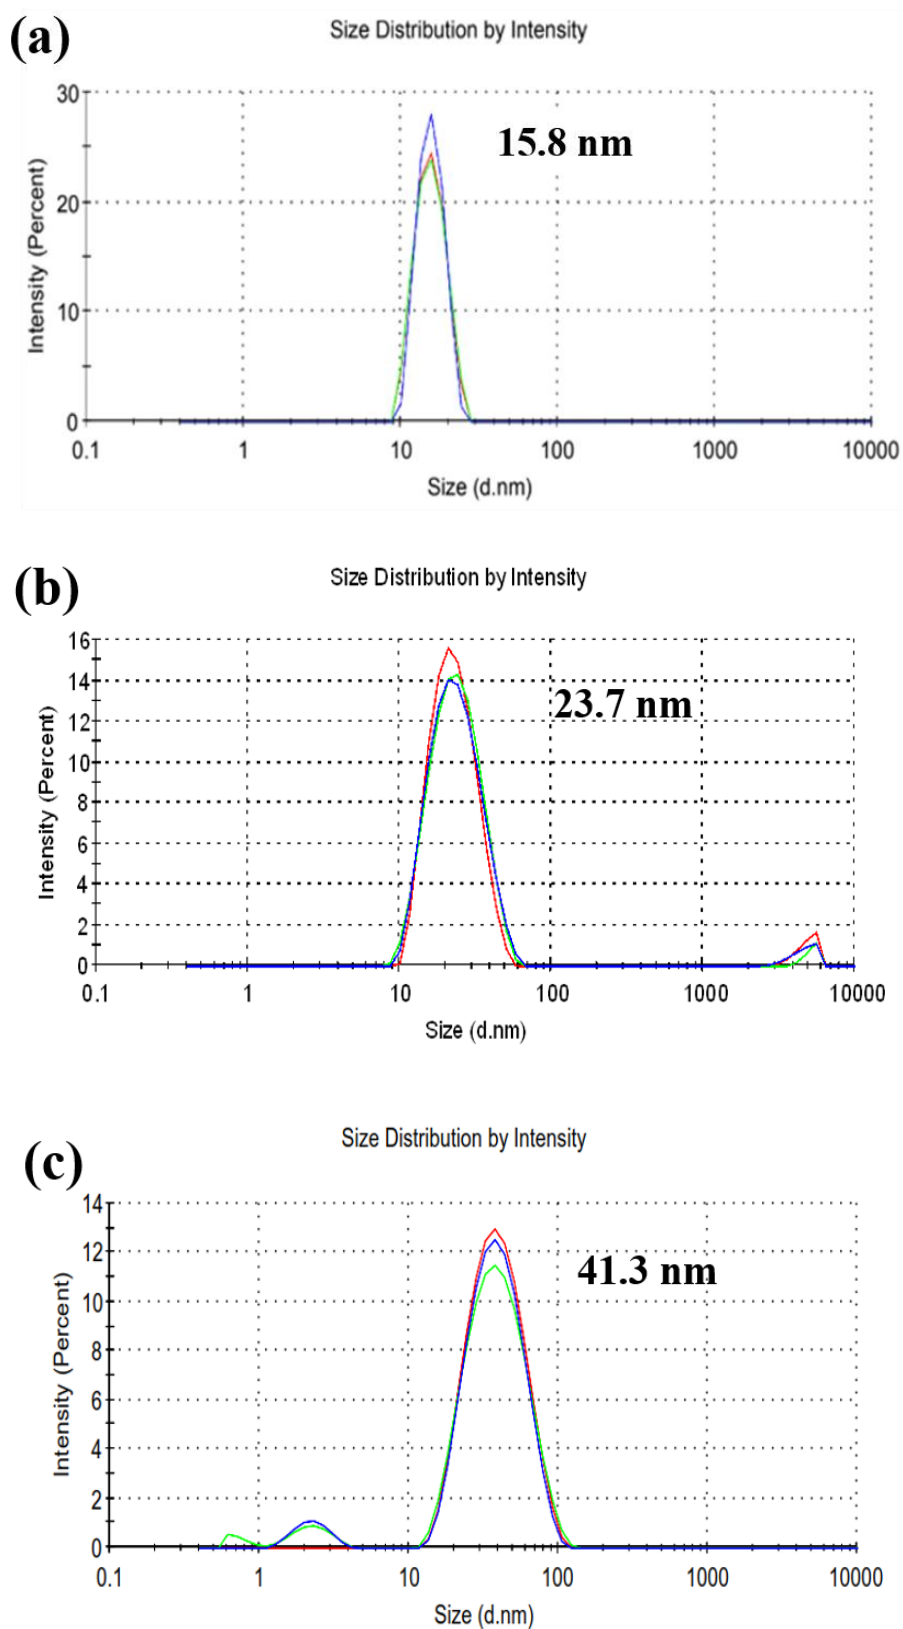

**Fig. S3** Hydrodynamic particle size distributions measured by DLS for a solution of (a) AuNPs, (b) AuNP@mSAM, and (c) HNPs three times.

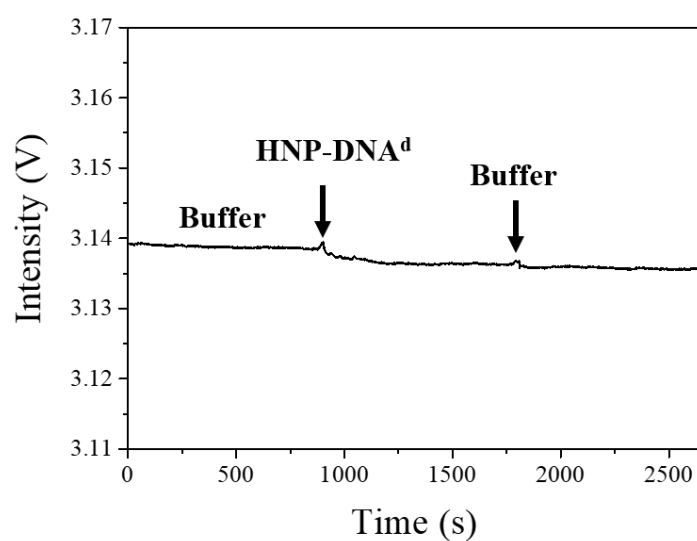

**Fig. S4** Background nonspecific adsorption test: Real-time response of a sensor fiber upon injection of a solution of HNP-DNA<sup>d</sup> ( $\sim 5 \times 10^{-10}$  M).

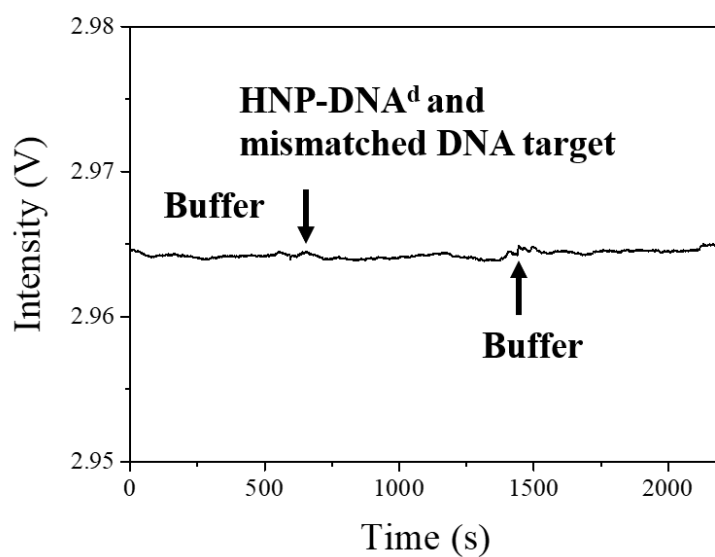

**Fig. S5** Specificity test: Real-time response of a sensor fiber upon injection of a solution containing mismatched DNA ( $1 \times 10^{-10}$  M) and HNP-DNA<sup>d</sup> ( $\sim 5 \times 10^{-10}$  M).
